# Supplementary material
Source: PubMed Central journal article supplement (PMC2953537)
Supplement: NIHMS192510-supplement-5.pdf [file NIHMS192510-supplement-5.pdf]

**Progeny frequencies during breeding of *bim*<sup>-/-</sup>*bad*<sup>-/-</sup> mice**

**a**  $Bim^{+/-} Bad^{+/-}$  X  $Bim^{+/+} Bad^{-/-}$  (4 weeks)

---

| $Bim^{+/+} Bad^{+/-}$ | $Bim^{+/-} Bad^{-/-}$ | $Bim^{+/-} Bad^{+/-}$ | $Bim^{+/-} Bad^{-/-}$ | Total   |
|-----------------------|-----------------------|-----------------------|-----------------------|---------|
| 34 (36)               | 35 (36)               | 36 (36)               | 39 (36)               | n = 144 |

**b**  $Bim^{+/-} Bad^{-/-}$  X  $Bim^{+/-} Bad^{-/-}$  (4 weeks)

---

| $Bim^{+/+} Bad^{-/-}$ | $Bim^{+/-} Bad^{-/-}$ | $Bim^{-/-} Bad^{-/-}$ | Total   |
|-----------------------|-----------------------|-----------------------|---------|
| 108 (82)              | 166 (166)             | 56 (82)               | n = 330 |

\* Values indicate observed numbers of offspring. Expected values are shown in brackets.
