# Supplementary material
Source: PubMed Central journal article supplement (PMC2953537)

**a Males**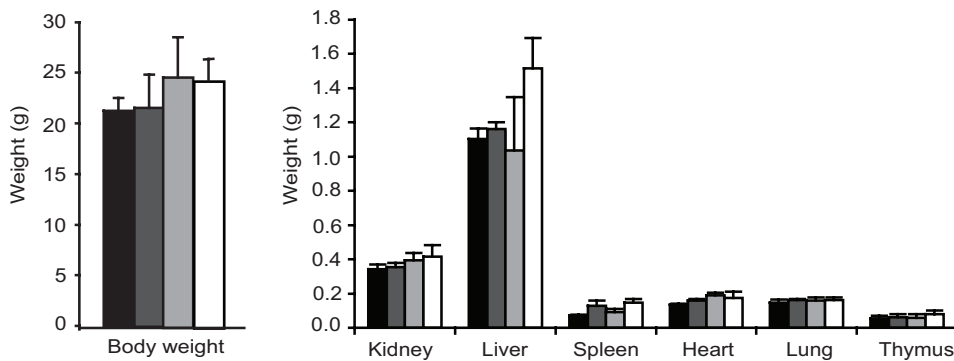**b Females**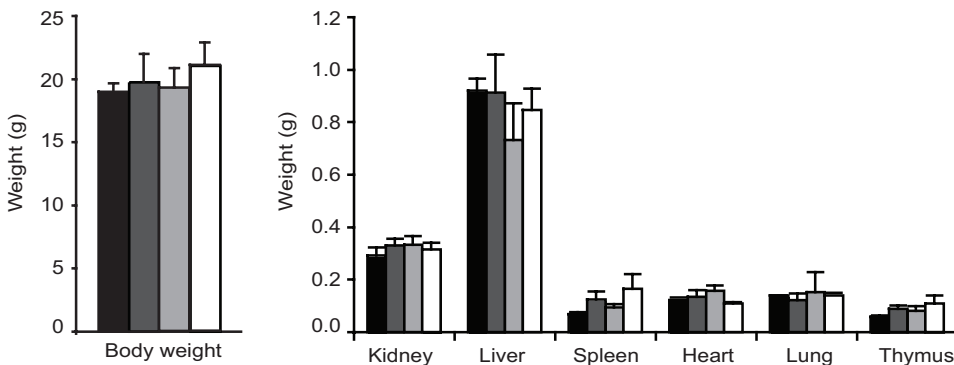

■ wt

■ *bim*<sup>-/-</sup>■ *bad*<sup>-/-</sup>□ *bim*<sup>-/-</sup>*bad*<sup>-/-</sup>

Supplement: NIHMS192510-supplement-1.pdf [file NIHMS192510-supplement-1.pdf]

6-12 weeks

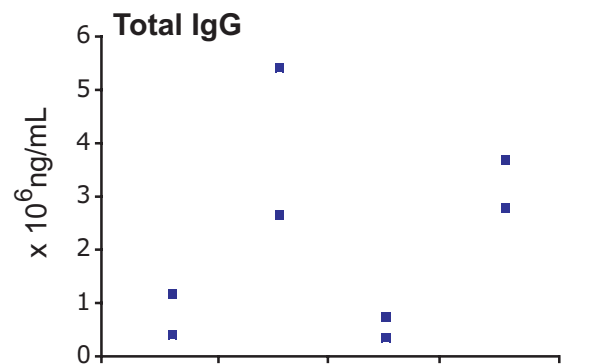

&gt;20 weeks

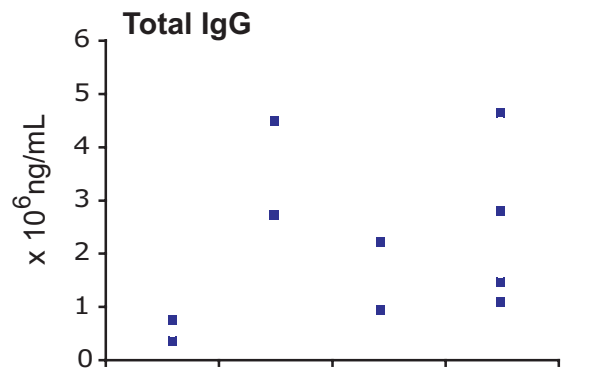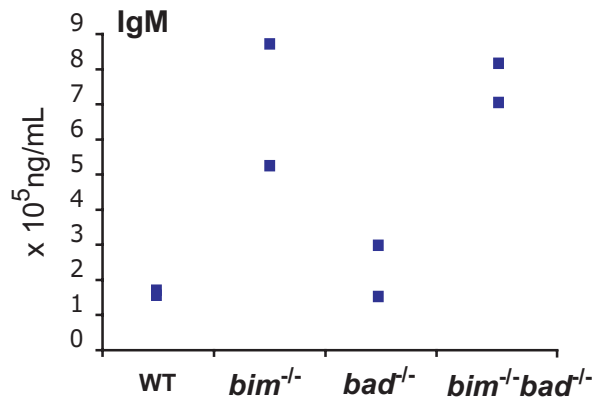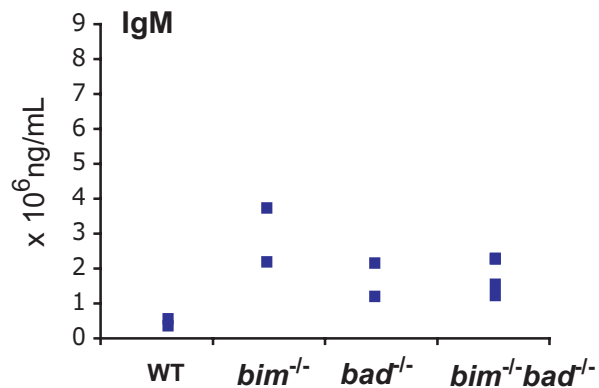

Supplement: NIHMS192510-supplement-2.pdf [file NIHMS192510-supplement-2.pdf]

**CD4<sup>+</sup> T Lymphocytes**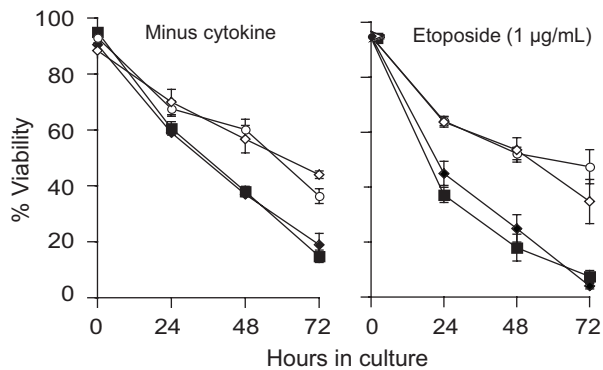**CD8<sup>+</sup> T Lymphocytes**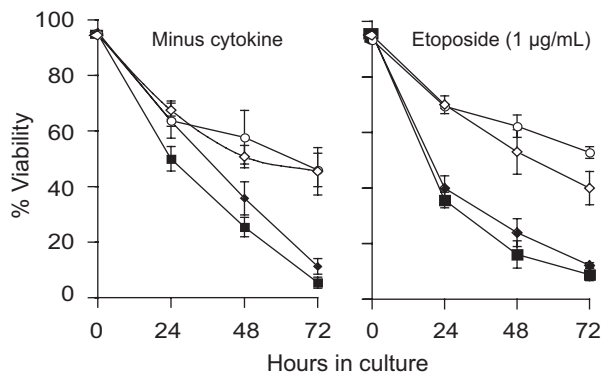

■ wt    ○ *bim*<sup>-/-</sup>    ◆ *bad*<sup>-/-</sup>    ◇ *bim*<sup>-/-</sup>*bad*<sup>-/-</sup>

Supplement: NIHMS192510-supplement-3.pdf [file NIHMS192510-supplement-3.pdf]

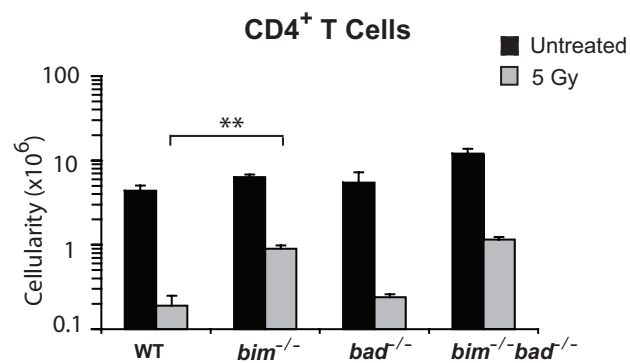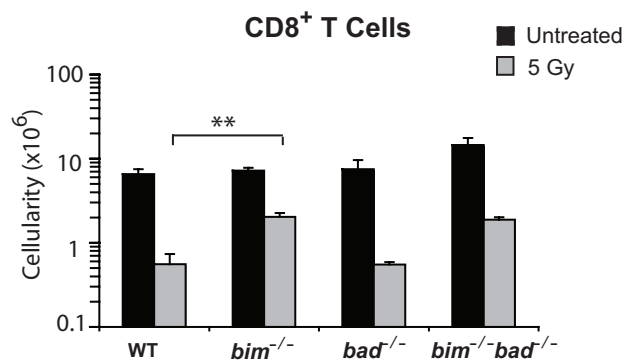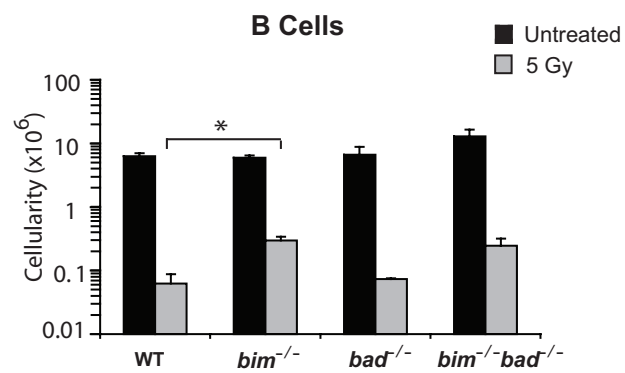

Supplement: NIHMS192510-supplement-4.pdf [file NIHMS192510-supplement-4.pdf]
